1 **Title:** The Pharmacodynamic-Toxicodynamic Relationship of AUC and CMAX in Vancomycin  
2 Induced Kidney Injury in an Animal Model

3

4 **Running Title:** The pharmacodynamic driver for AKI with intravenous injection

5

6 **Authors:** Sean N. AVEDISSIAN<sup>1-2</sup>, Gwendolyn PAIS<sup>3-4</sup>, Jiajun LIU<sup>3-4</sup>, J. Nicholas  
7 O'DONNELL<sup>5</sup>, Thomas P. LODISE<sup>5</sup>, Michael NEELY<sup>6</sup>, Walter C. PROZIALECK<sup>7</sup>, Peter C.  
8 LAMAR<sup>7</sup>, Leighton BECHER<sup>3</sup>, Marc H. SCHEETZ<sup>3-4,7\*</sup>

9

10 **Affiliations:** <sup>1</sup>Antiviral Pharmacology Laboratory, University of Nebraska Medical Center  
11 (UNMC) Center for Drug Discovery, UNMC, Omaha, NE, USA; <sup>2</sup>University of Nebraska  
12 Medical Center, College of Pharmacy, Omaha, NE, USA; <sup>3</sup> Department of Pharmacy Practice,  
13 Chicago College of Pharmacy, Midwestern University, Downers Grove, IL, USA; <sup>4</sup>Midwestern  
14 University Chicago College of Pharmacy Center of Pharmacometric Excellence; <sup>5</sup>Department of  
15 Pharmacy Practice, Albany College of Pharmacy and Health Sciences, Albany, NY, USA;  
16 <sup>6</sup>Children's Hospital Los Angeles and University of Southern California, Los Angeles, CA,  
17 USA; <sup>7</sup>College of Graduate Studies, Midwestern University, Downers Grove, IL, USA.

18

19 **\* Corresponding author and reprint requests:** Marc H. Scheetz, PharmD, MSc; Professor of  
20 Pharmacy Practice and Pharmacology; Midwestern University; 555 31st  
21 St., Downers Grove, IL 60515, Phone: 630-515-6116; Fax: 630-515-6958; Email:  
22 [mschee@midwestern.edu](mailto:mschee@midwestern.edu)

23 **Running Title:** Vancomycin exposure driver for AKI

24 **Transparency Declaration:** Dr. Scheetz has ongoing research contracts with Nevakar and filed  
25 patent US10688195B2. All other authors have no other related conflicts of interest to declare.

26

27 **Funding:** Research reported in this publication was supported by National Institute of Allergy  
28 and Infectious Diseases under award numbers R15-AI105742 and R21-AI149026. The content is  
29 solely the responsibility of the authors and does not necessarily represent the official views of the  
30 National Institutes of Health

31

32 **Word count:** 2889

**Abstract word count:** 200

33 **ABSTRACT**

34 **Background:** Vancomycin induces exposure-related acute kidney injury. However, the  
35 pharmacokinetic-toxicodynamic (PK-TD) relationship remains unclear.

36 **Methods:** Sprague-Dawley rats received IV vancomycin doses of 300mg/kg/day and  
37 400mg/kg/day, divided once, twice, thrice or 4xdaily (i.e., QD, BID, TID or QID) over 24-hours.  
38 Up to 8-samples were drawn during the 24-hour dosing period. Twenty-four-hour urine was  
39 collected and assayed for kidney injury molecule-1 (KIM-1). Vancomycin was quantified via  
40 LC-MS/MS. Following terminal sampling, nephrectomy and histopathologic analyses were  
41 conducted. PK analyses were conducted using Pmetrics. PK exposures (i.e.  $AUC_{0-24h}$ ,  $C_{MAX_{0-24h}}$ )  
42 were calculated for each rat, and PK-TD relationships were discerned.

43 **Results:** A total of 53-rats generated PK-TD data. A 2-compartment model fit the data well  
44 (Bayesian observed vs. predicted concentrations,  $R^2=0.96$ ). KIM-1 values were greater in QD  
45 and BID groups (P-values: QD vs TID: $<0.002$ , QD vs QID: $<0.004$ , BID vs TID: $<0.002$ , and  
46 BID vs QID: $<0.004$ ). Exposure–response relationships were observed between KIM-1 vs  
47  $C_{MAX_{0-24h}}$  and  $AUC_{0-24h}$  ( $R^2=0.7$  and  $0.68$ ). Corrected Akaike’s information criterion  
48 showed  $C_{MAX_{0-24h}}$  as most predictive PK-TD driver for vancomycin-induced kidney injury  
49 (VIKI) (-5.28 versus -1.95).

50 **Conclusions:** While PK-TD indices are often inter-correlated, maximal concentrations and fewer  
51 doses (for the same total daily amount) resulted in increased VIKI in our rat model.

52

53 Abstract (biorxiv version)

54 Background: Vancomycin induces exposure related acute kidney injury. However, the

55 pharmacokinetic toxicodynamic (PK TD) relationship remains unclear.

56 Methods: Sprague Dawley rats received IV vancomycin doses of 300mg/kg/day and

57 400mg/kg/day, divided once, twice, thrice or 4xdaily (i.e., QD, BID, TID or QID) over 24 hours.

58 Up to 8 samples were drawn during the 24 hour dosing period. Twenty four hour urine was

59 collected and assayed for kidney injury molecule 1 (KIM 1). Vancomycin was quantified via LC

60 MS/MS. Following terminal sampling, nephrectomy and histopathologic analyses were

61 conducted. PK analyses were conducted using Pmetrics. PK exposures (i.e. AUC<sub>0-24h</sub>, C<sub>MAX0</sub>

62 24h,) were calculated for each rat, and PK TD relationships were discerned.

63 Results: A total of 53 rats generated PK TD data. A 2compartment model fit the data well

64 (Bayesian observed vs. predicted concentrations, R<sup>2</sup>: 0.96). KIM 1 values were greater in QD

65 and BID groups (P values: QD vs TID:<0.002, QD vs QID:<0.004, BID vs TID:<0.002, and BID

66 vs QID:<0.004). Exposure–response relationships were observed between KIM 1 vs C<sub>MAX0,24</sub>

67 and AUC<sub>0,24</sub> (R<sup>2</sup>: 0.7 and 0.68). Corrected Akaike information criterion showed C<sub>MAX0,24</sub> as

68 most predictive PK TD driver for vancomycin induced kidney injury (VIKI) ( 5.28 vs 1.95).

69 Conclusions: While PK TD indices are often inter correlated, maximal concentrations and fewer

70 doses (for the same total daily amount) resulted in increased VIKI in our rat model.

71 **Keywords:** vancomycin, acute kidney injury, pharmacokinetics, biological markers

72 **Introduction**

73  
74 Vancomycin was approved for clinical use in 1958 and is still one of the most commonly  
75 used antibiotics in the hospital setting because of its activity against methicillin-resistant  
76 *Staphylococcus aureus* (MRSA).[1] The initial pharmacokinetic/pharmacodynamic (PK/PD)  
77 efficacy studies performed in neutropenic mouse models demonstrated that the exposures  
78 calculated as area under the curve (AUC) divided by organism minimum inhibitory  
79 concentration (MIC) explained efficacy.[2, 3] Indeed, the 2020 vancomycin guidelines now  
80 recommend AUC monitoring to maximize efficacy for *S.aureus* infections.[4] The guidelines  
81 also noted that AUC monitoring and tighter control of vancomycin exposures may result in less  
82 kidney injury.

83 The AUC therapeutic window for vancomycin has been described in human and animal  
84 studies. A prospective clinical trial demonstrated that AKI increased above a 24 hour-AUC of  
85 515 mg\*h/L and that efficacy did not increase for MRSA bloodstream treatments above these  
86 exposures.[5] This ceiling threshold is consistent with other clinical data; a meta-analysis that  
87 included this study suggested a threshold AUC of 650 mg\*h/L[6]. Preclinical rat studies have  
88 also found a consistent target, an AUC threshold of 482.2 has predicted 90% of maximal kidney  
89 injury biomarker response.[7] Thus, there is considerable evidence to support AUC as useful  
90 predictor of kidney injury, and thresholds are similar between humans and rats. It is still  
91 unknown if AUCs or maximal concentrations (Cmax) drives the toxicodynamic relationship for  
92 kidney injury. Herein, we present the results of dose fractionation experiments to better  
93 understand the PK/TD driver of vancomycin-induced kidney injury (VIKI).

94

## 95 **Materials and Methods**

96 This PK/TD study was conducted at Midwestern University in Downers Grove, IL. All  
97 study methods were approved by the Institutional Animal Care and Use Committee (IACUC;  
98 Protocol #2295) and conducted in compliance with the National Institutes of Health Guide for  
99 the Care and Use of Laboratory Animals.[8]]

100

### 101 *Experimental design and animals*

102 Experimental methods and design were similar to those described previously.[7] Male  
103 Sprague-Dawley rats (N=53, approximately 8-10 weeks old, mean purchase weight 310g) were  
104 housed individually in a light and temperature-controlled room for the duration of the study and  
105 allowed free access to water and food. Rats (n=5-9 per dosing protocol) were administered IV  
106 injections of clinical-grade vancomycin (n=48) in normal saline (NS) or NS only (n=5, control)  
107 as previously described.[7] In brief, rats were placed into a treatment or control group  
108 (treatment receiving vancomycin or normal saline, respectively). Vancomycin-treated rats  
109 received total daily doses of 300, or 400 mg/kg as either a thrice or four times daily divided dose  
110 over 24 hours (e.g., 300 mg/kg was given as a thrice injection [100 mg/kg three times daily] or  
111 as 75 mg/kg four times daily for a total of 24 hours). Previous animal data from our lab  
112 comprised the 300 and 400 mg/kg/day daily and twice daily cohorts (i.e., QD and BID) [7]. A  
113 complete animal dosing flow chart can be found in supplemental Figure 1. The 300-400  
114 mg/kg/day dosing range was chosen based on the known nephrotoxic effect observed in our  
115 previous IV study [7] and to span the higher end of the clinical allometric range. For example,  
116 the clinical kidney injury threshold of  $\geq 4$  grams/day in a 70-kg patient (i.e., 57 mg/kg/day in

117 humans) scales allometrically to 350 mg/kg in the rat. [9, 10] Data were analyzed for all animals  
118 that were included in the protocol.

119

### 120 *Blood and urine sampling*

121 Surgical catheters were implanted 24 hours prior to protocol initiation. Blood samples  
122 were drawn from a single right-side internal jugular vein catheter, and dosing occurred via the  
123 left-side internal jugular vein catheter. A maximum of 8 samples per animal were obtained and  
124 scheduled at 0, 15, 30, 60, 120, 240, 750 and 1440 min post first dose for the once daily and  
125 twice daily dosing treatment protocol. The thrice dosing treatment protocol animals were  
126 sampled at 0, 15, 30, 60, 120, 240, 480, and 504 min. The QID daily dosing treatment protocol  
127 animals were sampled at 0, 15, 30, 60, 240, 360, 384 and 1094 min. Each sample (0.25 mL  
128 aliquot) was replaced with an equivalent volume of NS to maintain euvoemia. Blood samples  
129 from vancomycin-treated animals were immediately transferred to a disodium  
130 ethylenediaminetetraacetic acid (EDTA, [Sigma-Aldrich Chemical Company, Milwaukee WI])  
131 treated microcentrifuge tube and centrifuged at 3000 rpm for 10 minutes. Plasma supernatant  
132 was collected and stored at -80°C for batch sample analysis.

133 Following the 2 hour blood sample, animals were placed in metabolic cages for urine  
134 collection (Nalgene, catalogue # 650-0350, Rochester, NY) for the remainder of the 24 hour  
135 study (with the exception that they were briefly removed for scheduled blood samples and  
136 vancomycin doses). Urine volume was measured at 12 and 24 hours. Urine was centrifuged at  
137 400 x g for 5 minutes, and the supernatant was stored at -80°C until batch analysis.

138 *Chemicals and reagents*

139           Animals were administered clinical grade vancomycin hydrochloride for injection (Lot#: 140 591655DD) obtained commercially (Hospira, Lake Forrest, IL). All solvents were of liquid 141 chromatography-tandem mass spectrometry (LC-MS/MS) grade. For LC-MS/MS assay 142 purposes, vancomycin hydrochloride, United States Pharmacopeia was used (Enzo Life Science, 143 Farmingdale, NY) with a purity of 99.3%. Polymyxin B (Sigma-Aldrich, St. Louis, MO), 144 acetonitrile, and methanol were purchased from VWR International (Radnor, PA). Formic acid 145 was obtained from Fischer Scientific (Waltham, MA). Frozen, non-medicated, non-immunized, 146 pooled Sprague-Dawley rat plasma (anticoagulated with disodium EDTA) was used for 147 calibration of standard curves (BioreclamationIVT, Westbury, NY).

148

149 *Determination of vancomycin concentrations in plasma*

150           Plasma concentrations of vancomycin were quantified with LC and column conditions 151 similar to those used in our previous report [7]. The lower limit of quantification was 0.25 mg/L. 152 Precision was <8.6% for all measurements, including intra- and inter-day assay measurements. 153 Greater than 92% of the analyte was recovered in all samples tested with an overall mean assay 154 accuracy of 100%. Any samples measuring above the upper limit of quantification were diluted 155 per standard protocol and requantified.

156

157 *Determination of urinary biomarkers of AKI*

158           Urine samples were analyzed in batch to determine concentrations of KIM-1. 159 Microsphere-based Luminex X-MAP technology was used for the determination of all 160 biomarker concentrations, as previously described. [11, 12] Urine samples were aliquoted into



161 96-well plates supplied with MILLIPLEX® MAP Rat Kidney Toxicity Magnetic Bead Panels 1  
162 and 2 (EMD Millipore Corporation, Charles, MO), prepared and analyzed according to the  
163 manufacturer's recommendations.

164

### 165 *Histopathology Kidney Scoring*

166 Following terminal blood sampling, bilateral nephrectomy was performed under  
167 anesthesia as previously described [13]. Briefly, kidneys were washed in cold isotonic saline and  
168 preserved in 10% formalin solution for histologic examination. Histopathologic analyses were  
169 conducted by IDEXX BioAnalytics (Westbrook, Maine). Pathologists only received access to  
170 nominal dosing group assignment. Scoring was conducted according to the Critical Path  
171 Institute's Predictive Safety Testing Consortium Nephrotoxicity Working Group's histologic  
172 injury lexicon which utilizes a 0-5 point ordinal scale (25). This scoring system assigns higher  
173 scores to increasing levels of damage (0, no evidence of damage; 1, minimal; 2, mild; 3,  
174 moderate; 4, marked; 5, severe/massive) and has been validated previously (17, 25). The  
175 composite score for each animal was calculated as the highest ordinal score for histopathologic  
176 changes at any kidney site (25).

177

### 178 *Vancomycin pharmacokinetic model and exposure determination*

179 We employed the Bayesian priors from our previously published pharmacokinetic model  
180 [7] to generated Bayesian posteriors for all N= 53 animals reported in this manuscript.  
181 Pharmacokinetic analyses were completed using the Pmetrics package version 1.5.0 (Los  
182 Angeles, CA) for R version 3.2.1 (R Foundation for Statistical Computing, Vienna, Austria)[14,  
183 15] with model assessment as previously described [7].

184 *Estimation of PK exposure profiles and statistical analysis*

185           The pharmacokinetic model was utilized to obtain median maximum a posteriori  
186 probability (MAP) Bayesian vancomycin plasma concentration estimates at 12-minute intervals  
187 over the 24 hour study period, generated from each animal's measured vancomycin  
188 concentrations, exact dose, and dosing schedule. Bayesian posteriors for each animal were used  
189 to determine exposures over the 24-hour time period (i.e.,  $AUC_{0-24h}$ ,  $C_{MAX_{0-24h}}$ ). The  
190 pharmacokinetic value  $C_{MAX_{0-24h}}$  were calculated using 'makeNCA' within Pmetrics (Los  
191 Angeles, CA, USA) [14, 16]. The highest Bayesian posterior concentration was determined to be  
192 each individual animal's  $C_{MAX_{0-24h}}$ . Twenty-four hour exposure, as measured by  $AUC_{0-24h}$ , was  
193 calculated using the trapezoidal rule within the Pmetrics command 'makeAUC' [14, 16].  
194 Cumulative  $C_{MAX_{0-24h}}$  was also calculated for the dose fractionation groups (i.e., BID CMAX  
195 multiplied by 2, TID CMAX multiplied by 3, QID CMAX multiplied by 4) and standardized to  
196 mg to allow comparison and assess successfulness of varying  $C_{MAX_{0-24h}}$  while holding  $AUC_{0-24h}$   
197 constant.

198 *Association of PK measures with urinary AKI biomarker KIM-1*

199           Pharmacokinetic exposure estimates were assessed for relationships with KIM-1 using  
200 GraphPad Prism version 7.02 (GraphPad Software Inc., La Jolla, CA). PK/TD exposure-  
201 response relationships with KIM-1 were evaluated using Spearman's rank correlation coefficient.  
202 Hill-type functions and log transformations of variables were employed to explore the  
203 relationship between PK exposures and KIM-1. Correlation coefficients ( $R^2$ ) and corrected  
204 Akaike information criterions (AICc) were calculated and compared between exposures metrics  
205 (C<sub>MAX</sub> vs. AUC) to evaluate overall fit. KIM-1 was the primary biomarker of interest given  
206 specificity for proximal tubule damage and identification of VIKI in the rat model [7, 17, 18].  
207

208 *Statistical analysis for between treatment group comparisons*

209           Statistical analysis for between treatment group comparisons was performed using  
210 Intercooled Stata, version 14.2 (College Station, TX: StataCorp LP.). PK exposure  
211 measurements, i.e. AUC<sub>0-24h</sub>, C<sub>MAX</sub><sub>0-24h</sub>, were compared across vancomycin total daily dose and  
212 dosing frequency groups for 300 mg/kg/day and 400 mg/kg/day. Log transformations were  
213 employed as needed. Differences between treatment groups for KIM-1 and standardized C<sub>MAX</sub>  
214 were visualized with LOWESS regression and compared with the Kruskal-Wallis Dunn pairwise  
215 comparison with the Bonferroni adjustment. All tests were two-tailed, with an *a priori* level of  
216 statistical significance set at an alpha of 0.05.

217 **Results**

218 *Characteristics of animal cohort*

219 All 48 animals from the 300 mg/400 mg total daily dose cohorts contributed  
220 pharmacokinetic model data (5 controls were not included in model since, by design, they did  
221 not have quantifiable vancomycin levels). Mean baseline weights were not significantly different  
222 between controls and vancomycin dosing protocol animals (307.4 g versus 313.6 g, P=0.49).  
223 Overall 24-hour urine output was significantly different between controls and the vancomycin  
224 treated animals (4.2 versus 16.11 mL, P<0001). Lastly, median histopathology scores differed  
225 numerically though not statistically significantly between controls and the entire vancomycin  
226 treated cohort (1 versus 2, P=0.088). However, median KIM-1 values were significantly different  
227 between controls and vancomycin dosing protocol animals (0.63 ng/mL versus 6.169 ng/mL,  
228 p<0.001).

229 In stratified dosing group analyses (i.e. 300 mg/kg/day and 400 mg/kg/day), there was a  
230 significant difference in median KIM-1 between fractionation schemes. In the 300 mg/kg/day  
231 group, median KIM-1 values were significantly different in the daily vs TID (10.7 ng/mL vs. 2.3  
232 ng/mL, P=0.03) and daily vs QID (10.70 ng/mL vs. 1.46 ng/mL, P<0.01). In the 400 mg/kg/day  
233 group, median KIM-1 values only differed in the BID vs QID (13.3 ng/mL vs. 4 ng/mL) dose  
234 fractionation group (P-value: <0.001) A complete pairwise comparisons can be found in Table 1.

235

236 *Vancomycin PK models, parameter estimates and exposures*

237 Median (CV%) parameter values for the pharmacokinetic model for Ke, V, KCP and  
238 KPC were: 0.7 hr<sup>-1</sup> (60.81), 0.07 L (76.69), 1.42 hr<sup>-1</sup> (136.87), 1.52 hr<sup>-1</sup> (160.86), respectively.  
239 Model predictive performance demonstrated observed versus Bayesian predicted concentrations,  
240 bias, imprecision (i.e., bias-adjusted mean weighted squared prediction error) and the coefficient

241 of determination ( $R^2$ ) of 0.101 mg/L,  $2.61 \text{ (mg/L)}^2$ , and 0.958 respectively (Figure 1). A  
242 complete concentration vs. time profile plot by dose fractionation for all animals in the 300  
243 mg/kg/day and 400 mg/kg/day can be found in Figure 2. There were no significant differences  
244 found in CMAX standardized by fractionation and mg in all animals.

245

#### 246 *Exposure-Response Relationships*

247 Four parameter Hill models best described the exposure:biomarker relationships.  
248 Exposure:biomarker relationships were found between  $AUC_{0-24}$  versus KIM-1 ( $R^2=0.68$ ) and  
249  $C_{MAX_{0-24}}$  versus KIM-1 ( $R^2=0.7$ ). Overall,  $AUC_{0-24}$  versus KIM-1 was slightly less predictive  
250 than  $C_{MAX_{0-24}}$  versus KIM-1 as the  $C_{MAX_{0-24}}$  model performed better based on AICc  
251 comparison (AICc=-5.28 vs. AICc= -1.95). All exposure-biomarker relationships are shown in  
252 Figure 3.

253

#### 254 *Vancomycin Dose Fractionation vs Biomarker Relationships*

255 The plot visually displays decreasing urinary KIM-1 concentrations as doses were  
256 increasingly fractionated between once and four times daily for both daily dose groups (i.e. 300  
257 and 400 mg/kg/day). Pairwise comparison showed that there was a significant difference in  
258 KIM-1 between QD vs TID and QID groups and BID to TID and QID (P-values all  $<0.01$ ). A  
259 visual representation of these trends and differences are shown in Figure 4.

260 **Discussion**

261 This pre-clinical study provides continued evidence that VIKI is caused by high maximal  
262 vancomycin concentrations and elevated exposures. Importantly in our model, CMAX was  
263 marginally better than AUC in explaining toxicodynamic relationships. These findings, along  
264 with studies that have compared prolonged infusion vancomycin to standard intermittently  
265 infused vancomycin, suggest that giving the same total daily dose in fractionated fashion or with  
266 continuous infusion may improve kidney outcomes.[19-23] In our trial where we were able to  
267 fractionate doses, we identified that CMAX exhibited a slightly improved relationship with  
268 KIM-1 compared to AUC 4-parameter Hill model fit (CMAX versus KIM-1:  $R^2 = 0.7$ ,  $AIC_c = -$   
269  $5.28$ ; AUC versus KIM-1:  $R^2 = 0.68$ ,  $AIC_c = -1.95$ ). Further, the fractionation scheme resulted in  
270 lower KIM-1. That is, when the daily dose was split into several doses, kidney injury was less.  
271 For the fractionation schemes, we demonstrated that CMAX remained constant between the  
272 groups ( $p=0.34$ ) and that urinary KIM-1 was lower in TID and QID groups than QD and BID (P-  
273 values all  $<0.01$ ).

274 The rat is a highly relevant pre-clinical model for drug induced acute kidney injury, as  
275 quantitative biomarkers that describe degree of injury are shared between humans and rats.[24,  
276 25] Adequate blood sample volumes are possible in the rat, thus allowing for a richly sampled  
277 PK design and careful characterization of vancomycin exposures in order to assess  
278 pharmacokinetic/toxicodynamic (PK/TD) relationships at the individual animal level. Further,  
279 PK/TD relationships are similar between this rat model and human VIKI. In both species,  
280 toxicity thresholds are  $\sim 500-600$  mg/L\*24hours.[5-7] KIM-1 was utilized as the surrogate of  
281 VIKI in this study as it is causally linked to histopathologic damage in V treated rats. KIM-1 is  
282 a specific marker of histopathologic proximal tubule injury in VIKI [7, 13]. KIM-1 has predicted

283 histopathologic rise ( $P < 0.001$ ) and was the best predictor of histopathologic damage score  $\geq 2$  on  
284 each study day (i.e. day 1, 2, 3, and 6) as determined by ROC area. Quantitatively, every 1  
285 ng/mL increase of KIM-1 increased the likelihood of a histopathologic score  $\geq 2$  by 1.3 fold  
286 ( $P < 0.001$ ).[5]

287 Our findings by fractionation group are similar to those from Konishi et al.'s study in  
288 Wistar rats. They found that creatinine clearance and superoxide dismutase were decreased in  
289 rats treated once daily vs. twice daily.[26] Our study is different in that we administered  
290 vancomycin intravenously and were additionally able to precisely estimate exposures for each rat  
291 in order to define the PK/TD relationships. Konishi et al. studied animals over 7 days while we  
292 studied a single day (as this is the PK/TD model that has best linked rat outcomes to human  
293 outcomes).[5, 7, 26] Their findings that vancomycin saturated similarly in the kidney between  
294 the two groups may suggest that outcomes will eventually converge toward equivocal if  
295 treatment is prolonged. That is, fractionating doses may provide benefit early; however, it will  
296 remain prudent to discontinue nephrotoxic drugs when they are not needed as human trials and  
297 animal models consistently show the kidney toxicity of vancomycin.[27]

298 Randomized studies will be necessary to discern if fractionating the daily dose of  
299 vancomycin ultimately improves outcomes for humans. Indeed, small clinical studies and meta-  
300 analyses have demonstrated that continuous infusions of vancomycin might result in less kidney  
301 injury than traditional intermittent infusions.[19, 21, 22] In theory, limiting the CMAX even for  
302 equivalent AUC exposures could improve the renal safety of vancomycin. The single  
303 prospective human trial that randomized patients to continuous infusion vancomycin (n=61) or  
304 traditional intermittent infusions (n=58) did not find a difference in renal outcomes between the  
305 groups. However the study was relatively underpowered to assess this outcome in the setting of a

306 heterogenous study population receiving varied concomitant therapies.[28] A prolonged  
307 vancomycin administration has also been considered in recent national guidelines which  
308 concluded with moderate evidence that the risk of developing nephrotoxicity with continuous  
309 infusion appears to be similar or lower than that with intermittent dosing.[4]

310         There are several limitations to this study. First, this study was limited to 24 hour dosing  
311 for our dose fractionation protocol. However as previously noted, elevations in biomarkers have  
312 already been linked to histopathologic damage within this time period [29]. Second, this  
313 employed allometric scaled doses that are known to result in toxicity, i.e. CMAX was not  
314 humanized. Additional studies will be needed to understand if the TD relationship found in this  
315 study is reproducible if CMAX is scaled to humanized values. It is notable that it is not possible  
316 to utilize standard practices of administering nephrotoxic agents to animals match human  
317 clearance when the outcome being assessed is AKI. Thus, continuous infusion may be the best  
318 way to parameter scale CMAX, and it is not clear if those studies will be more translational than  
319 the current approaches.

320         In summary, these data demonstrate that VIKI may be driven by CMAX<sub>0-24</sub>. These  
321 findings have clinical implications as dosing strategies may be able to dose fractionate a total  
322 daily vancomycin dose in efforts to maintain efficacy by maintaining AUC while decreasing  
323 toxicity. Further studies employing continuous infusion dosing strategies are warranted to further  
324 assess if administration scheme can mitigate toxicity.



325 **Acknowledgments:** We kindly acknowledge the Core Facility at Midwestern University for

326 access to the LCMS-MS.

327

328   References

- 329   1. Scheetz MH. Vancomycin: The pendulum swings. *Am J Health Syst Pharm* **2020**; 77:810-1.
- 330   2. Craig WA. Basic pharmacodynamics of antibacterials with clinical applications to the use of  
331   beta-lactams, glycopeptides, and linezolid. *Infect Dis Clin North Am* **2003**; 17:479-501.
- 332   3. Rybak MJ. The pharmacokinetic and pharmacodynamic properties of vancomycin. *Clinical*  
333   infectious diseases : an official publication of the Infectious Diseases Society of America **2006**;  
334   42 Suppl 1:S35-9.
- 335   4. Rybak MJ, Le J, Lodise TP, et al. Therapeutic monitoring of vancomycin for serious  
336   methicillin-resistant *Staphylococcus aureus* infections: A revised consensus guideline and review  
337   by the American Society of Health-System Pharmacists, the Infectious Diseases Society of  
338   America, the Pediatric Infectious Diseases Society, and the Society of Infectious Diseases  
339   Pharmacists. *Am J Health Syst Pharm* **2020**.
- 340   5. Pais GM, Avedissian SN, O'Donnell JN, et al. Comparative Performance of Urinary  
341   Biomarkers for Vancomycin-Induced Kidney Injury According to Timeline of Injury.  
342   *Antimicrobial agents and chemotherapy* **2019**; 63.
- 343   6. Aljefri DM, Avedissian SN, Rhodes NJ, Postelnick MJ, Nguyen K, Scheetz MH. Vancomycin  
344   Area under the Curve and Acute Kidney Injury: A Meta-analysis. *Clinical infectious diseases* :  
345   an official publication of the Infectious Diseases Society of America **2019**.
- 346   7. Avedissian SN, Pais GM, O'Donnell JN, et al. Twenty-four hour pharmacokinetic  
347   relationships for intravenous vancomycin and novel urinary biomarkers of acute kidney injury in  
348   a rat model. *J Antimicrob Chemother* **2019**.
- 349   8. . In: th, ed. *Guide for the Care and Use of Laboratory Animals*. Washington (DC), **2011**.

- 350 9. Lodise TP, Lomaestro B, Graves J, Drusano GL. Larger vancomycin doses (at least four  
351 grams per day) are associated with an increased incidence of nephrotoxicity. *Antimicrob Agents*  
352 *Chemother* **2008**; 52:1330-6.
- 353 10. Buckley MS, Hartsock NC, Berry AJ, et al. Comparison of acute kidney injury risk  
354 associated with vancomycin and concomitant piperacillin/tazobactam or cefepime in the  
355 intensive care unit. *Journal of critical care* **2018**; 48:32-8.
- 356 11. Prozialeck WC, Edwards JR, Lamar PC, Liu J, Vaidya VS, Bonventre JV. Expression of  
357 kidney injury molecule-1 (Kim-1) in relation to necrosis and apoptosis during the early stages of  
358 Cd-induced proximal tubule injury. *Toxicol Appl Pharmacol* **2009**; 238:306-14.
- 359 12. Prozialeck WC, Edwards JR, Vaidya VS, Bonventre JV. Preclinical evaluation of novel  
360 urinary biomarkers of cadmium nephrotoxicity. *Toxicol Appl Pharmacol* **2009**; 238:301-5.
- 361 13. O'Donnell JN, Rhodes NJ, Lodise TP, et al. 24-Hour Pharmacokinetic Relationships for  
362 Vancomycin and Novel Urinary Biomarkers of Acute Kidney Injury. *Antimicrobial agents and*  
363 *chemotherapy* **2017**; 61:e00416-17.
- 364 14. Neely MN, van Guilder MG, Yamada WM, Schumitzky A, Jelliffe RW. Accurate detection  
365 of outliers and subpopulations with Pmetrics, a nonparametric and parametric pharmacometric  
366 modeling and simulation package for R. *Ther Drug Monit* **2012**; 34:467-76.
- 367 15. Tatarinova T, Neely M, Bartroff J, et al. Two general methods for population  
368 pharmacokinetic modeling: non-parametric adaptive grid and non-parametric Bayesian. *Journal*  
369 *of pharmacokinetics and pharmacodynamics* **2013**; 40:189-99.
- 370 16. O'Donnell JN, O'Donnell EP, Kumar EJ, et al. Pharmacokinetics of centhaquin citrate in a  
371 dog model. *J Pharm Pharmacol* **2016**; 68:803-9.

- 372 17. O'Donnell JN, Rhodes NJ, Lodise TP, et al. 24-Hour Pharmacokinetic Relationships for  
373 Vancomycin and Novel Urinary Biomarkers of Acute Kidney Injury. *Antimicrob Agents*  
374 *Chemother* **2017**; 61.
- 375 18. Wong-Beringer A, Joo J, Tse E, Beringer P. Vancomycin-associated nephrotoxicity: a  
376 critical appraisal of risk with high-dose therapy. *International journal of antimicrobial agents*  
377 **2011**; 37:95-101.
- 378 19. Flannery AH, Bissell BD, Bastin MT, Morris PE, Neyra JA. Continuous Versus Intermittent  
379 Infusion of Vancomycin and the Risk of Acute Kidney Injury in Critically Ill Adults: A  
380 Systematic Review and Meta-Analysis. *Critical care medicine* **2020**.
- 381 20. Hanrahan T, Whitehouse T, Lipman J, Roberts JA. Vancomycin-associated nephrotoxicity: A  
382 meta-analysis of administration by continuous versus intermittent infusion. *Int J Antimicrob*  
383 *Agents* **2015**; 46:249-53.
- 384 21. Hao JJ, Chen H, Zhou JX. Continuous versus intermittent infusion of vancomycin in adult  
385 patients: A systematic review and meta-analysis. *Int J Antimicrob Agents* **2016**; 47:28-35.
- 386 22. Cataldo MA, Tacconelli E, Grilli E, Pea F, Petrosillo N. Continuous versus intermittent  
387 infusion of vancomycin for the treatment of Gram-positive infections: systematic review and  
388 meta-analysis. *J Antimicrob Chemother* **2012**; 67:17-24.
- 389 23. Ingram PR, Lye DC, Tambyah PA, Goh WP, Tam VH, Fisher DA. Risk factors for  
390 nephrotoxicity associated with continuous vancomycin infusion in outpatient parenteral  
391 antibiotic therapy. *J Antimicrob Chemother* **2008**; 62:168-71.
- 392 24. Food and Drug Administration. Review of Qualification Data for Biomarkers of  
393 Nephrotoxicity Submitted by the Predictive Safety Testing Consortium. Accessed 5/11/2020.  
394 Available at <https://www.fda.gov/media/87781/download>.

- 395 25. Food and Drug Administration. Biomarker Qualification Program Office of Clinical  
396 Pharmacology Full Qualification Package Review. Accessed 5/11/2020. Available at  
397 <https://www.fda.gov/media/93150/download>.
- 398 26. Konishi H, Morita Y, Mizumura M, Iga I, Nagai K. Difference in nephrotoxicity of  
399 vancomycin administered once daily and twice daily in rats. *J Chemother* **2013**; 25:273-8.
- 400 27. Wunderink RG, Niederman MS, Kollef MH, et al. Linezolid in methicillin-resistant  
401 *Staphylococcus aureus* nosocomial pneumonia: a randomized, controlled study. *Clin Infect Dis*  
402 **2012**; 54:621-9.
- 403 28. Wysocki M, Delatour F, Faurisson F, et al. Continuous versus intermittent infusion of  
404 vancomycin in severe *Staphylococcal* infections: prospective multicenter randomized study.  
405 *Antimicrobial agents and chemotherapy* **2001**; 45:2460-7.
- 406 29. Vaidya VS, Ozer JS, Dieterle F, et al. Kidney injury molecule-1 outperforms traditional  
407 biomarkers of kidney injury in preclinical biomarker qualification studies. *Nat Biotechnol* **2010**;  
408 28:478-85.
- 409

Figure 1. Best fit plot for Bayesian observed versus predicted plasma vancomycin concentrations utilizing the final 2-compartmental model

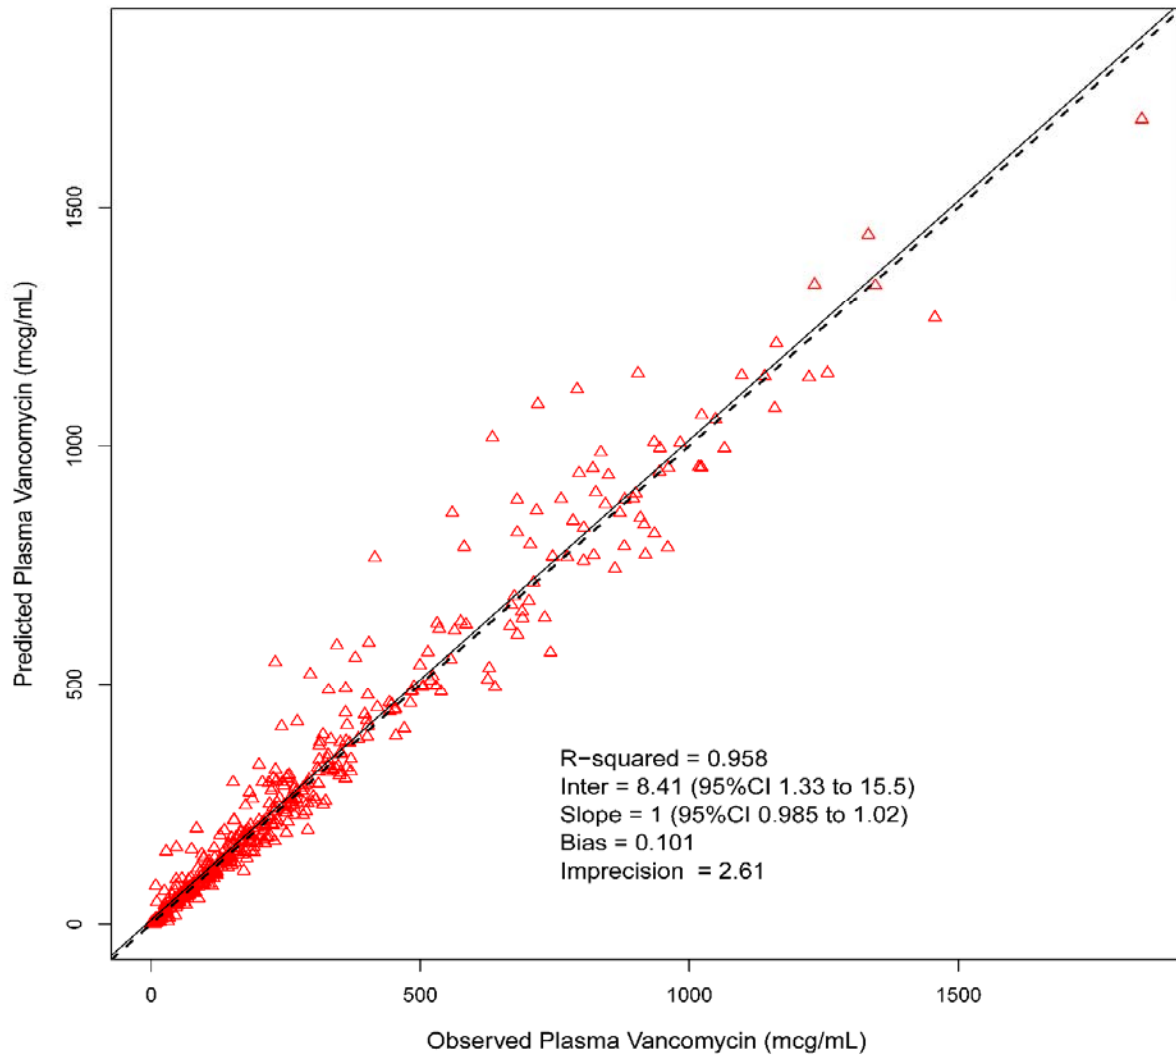

Figure 2. Concentration versus time plots for each dose fractionation group all animals (A) 300 mg/kg/day and (B) 400 mg/kg/day A).

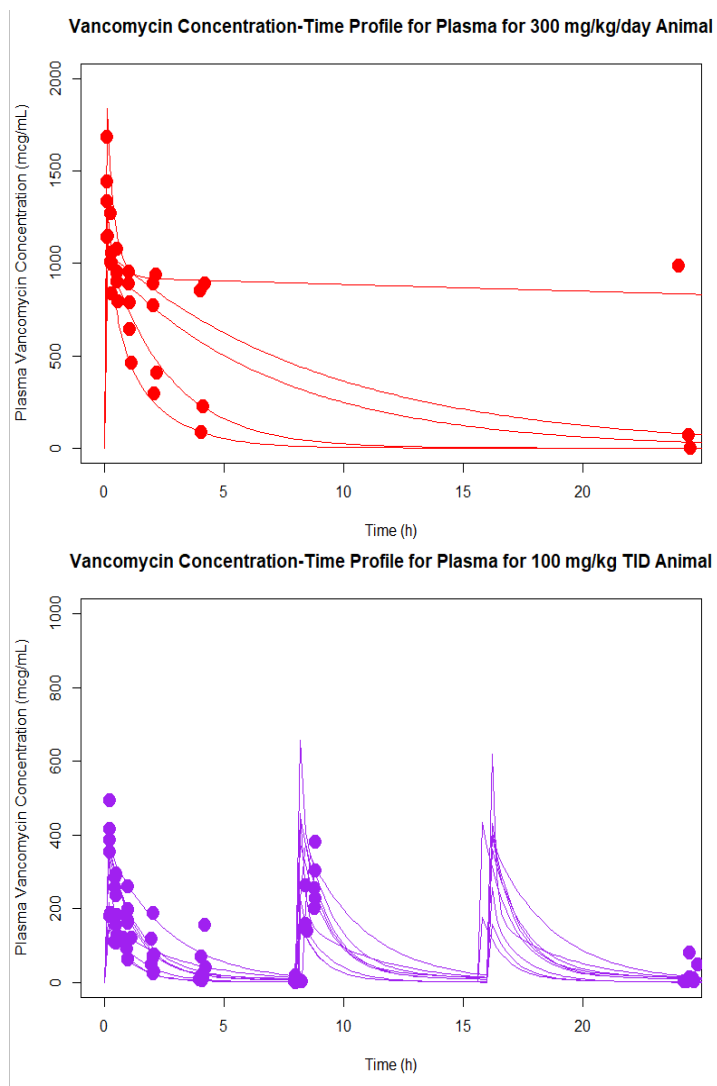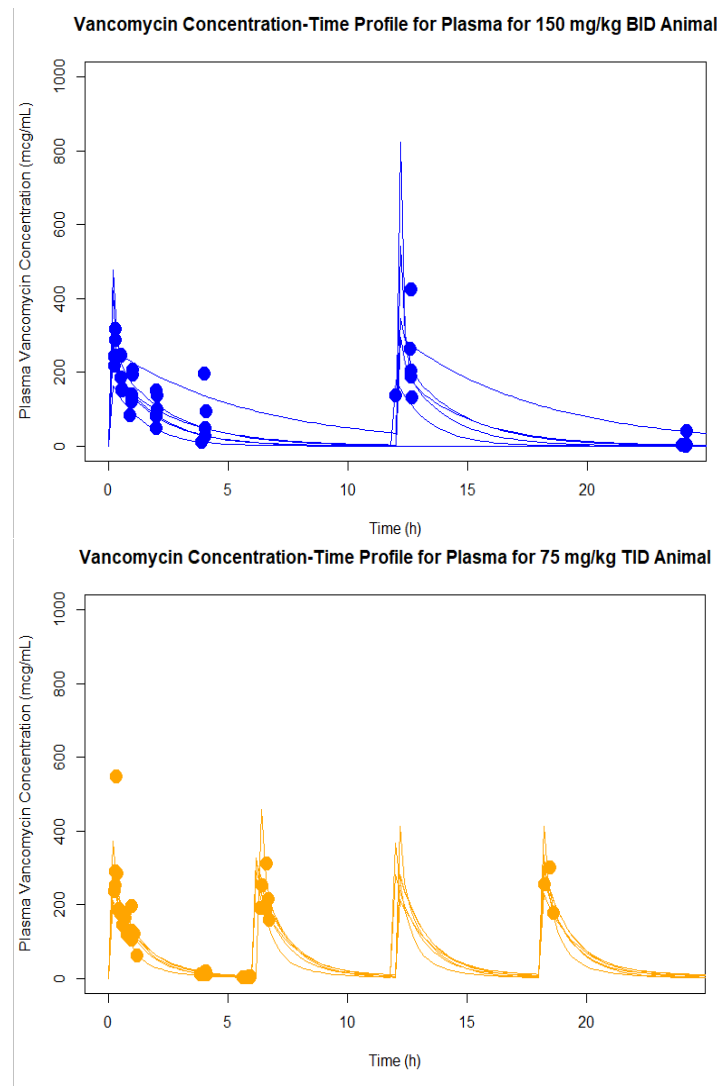

B).

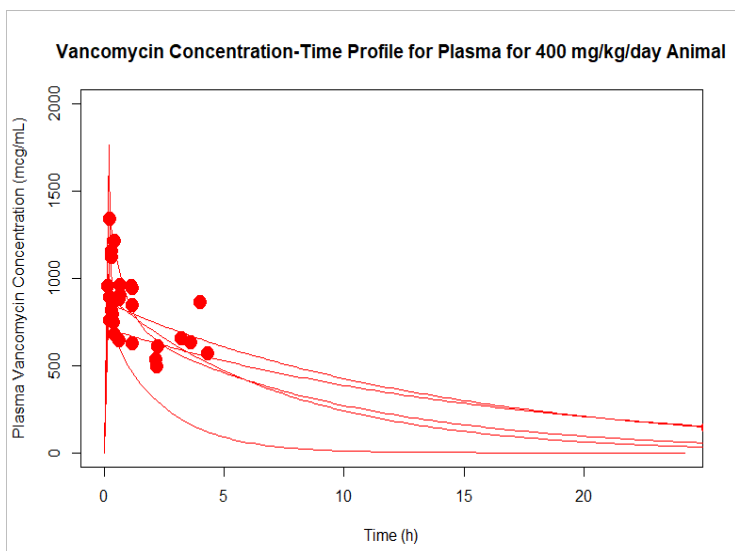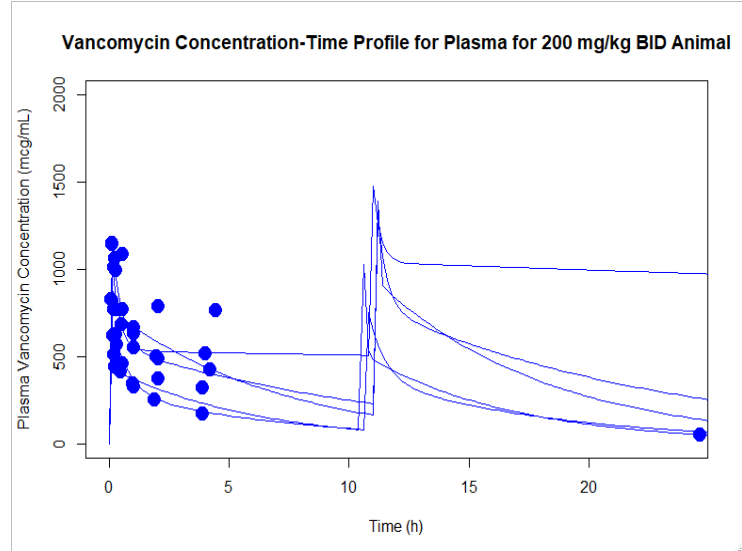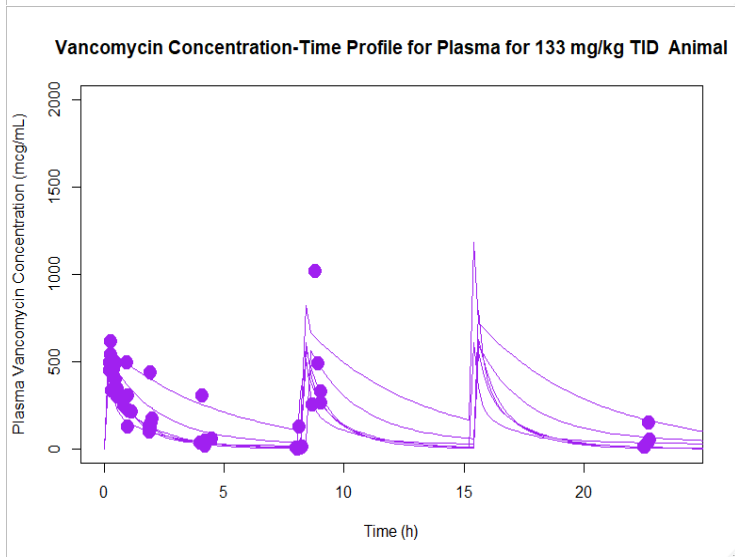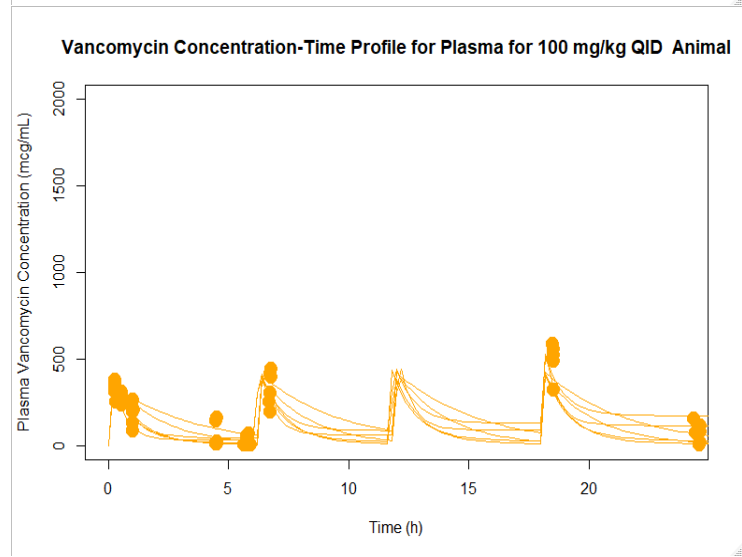

Abbreviations: QD=daily, BID=twice daily, TID=three times daily, QID=four times daily



Figure 3. (A)  $AUC_{0-24}$  (mg\*h/L), and (B)  $C_{MAX_{0-24}}$  (mg/L) versus urinary biomarkers KIM-1<sup>#</sup> (A, B, C) and OPN\* (D, E, F) relationship by 4-Parameter Hill model fit

A).

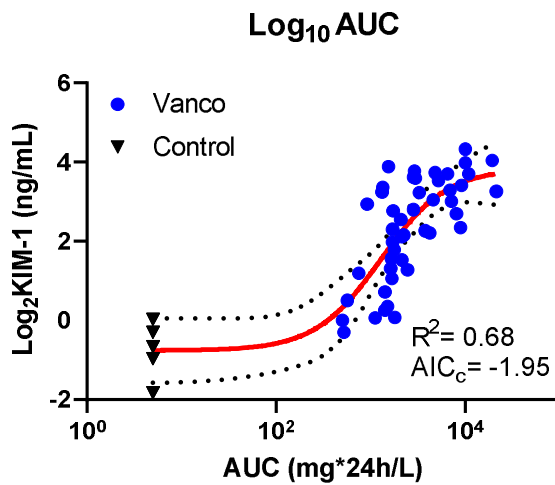

B).

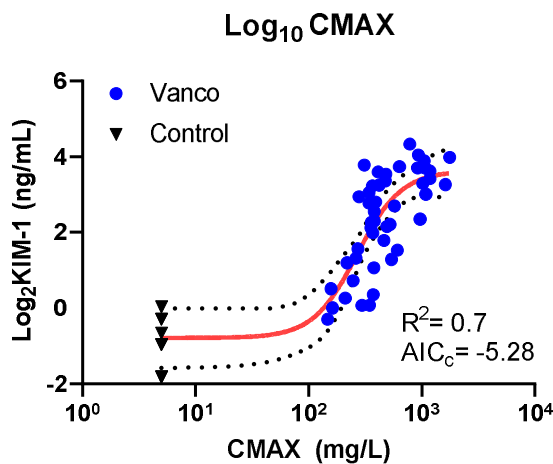

TD: 4-Parameter Hill model equation:  $Y = \text{Bottom} + (\text{Top} - \text{Bottom}) / (1 + 10^{((\text{LogEC}_{50} - X) * \text{Hill Slope}))}$

<sup>#</sup>units for biomarker in ng/mL. Biomarker values were Log<sub>2</sub> transformed and exposure values were Log<sub>10</sub> transformed.

Abbreviations: AUC= area under the curve, CMAX= maximum concentration, KIM-1= kidney injury molecule-1

Figure 4. Dose Fractionation vs. KIM-1 Relationship for all Animals

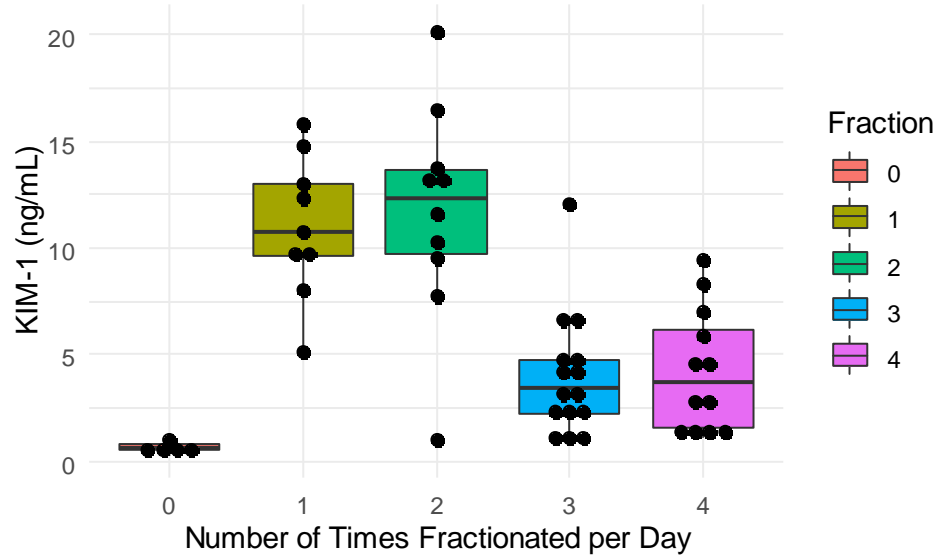

| Group Comparison | QD    | BID   | TID |
|------------------|-------|-------|-----|
| BID              | NS    | -     | -   |
| TID              | <0.01 | <0.01 | -   |
| QID              | <0.01 | <0.01 | NS  |

Abbreviations: KIM-1= kidney injury molecule-1, IQR= interquartile range, QD=daily,

BID=twice daily, TID=three times daily, QID=four times daily

\* Controls were excluded from statistical analysis given they did not receive vancomycin and are only shown graphically to demonstrate KIM-1 values absent therapy but with sham procedures.

Table 1: Biomarker KIM-1 summary for vancomycin treated animals by dose fractionation

| <b>300 mg/kg/day animals</b>  | <b>Daily (N=5)</b>      | <b>BID (N=5)</b>   | <b>TID (N=6)</b>   | <b>QID (N=6)</b>    | <b>P-value</b>   |
|-------------------------------|-------------------------|--------------------|--------------------|---------------------|------------------|
| Median KIM-1 (ng/mL)<br>(IQR) | 10.70* **<br>(9.8-12.3) | 9.5<br>(7.7-10.3)  | 2.3*<br>(1.43-4.9) | 1.46**<br>(1.2-2.5) | *0.03<br>**<0.01 |
| <b>400 mg/kg/day animals</b>  | <b>Daily (N=5)</b>      | <b>BID (N=6)</b>   | <b>TID (N=9)</b>   | <b>QID (N=6)</b>    | <b>P-value</b>   |
| Median KIM-1 (ng/mL)<br>(IQR) | 10.5<br>(6.6-14.4)      | 13.3*<br>(13-16.5) | 4*<br>(2.9-4.6)    | 6.4<br>(4.8-8.3)    | *<0.001          |

Abbreviations: KIM-1= kidney injury molecule-1, IQR= interquartile range, BID= twice daily, TID= three times daily, QID=four times daily

Supplemental Figure 1. Animal dosing flow chart

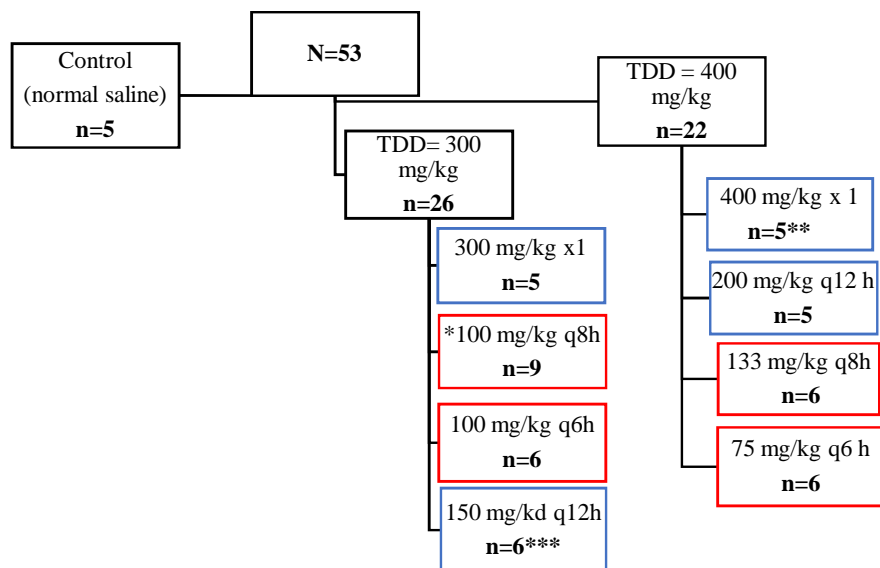

\*100 mg/kg q8h group was repeated

\*\*1 animal contributed partial PK

\*\*\*2 animals contributed partial PK or TD

Note: All 53 animals that received vancomycin were included in the PK model build.

New animals

Previous animals [7]

Abbreviations: IV = intravenous, TDD = total daily dose, x1= once daily dose, q8h = thrice daily dose, q6h = 4x daily dose, q12h=twice daily dose
